# Supplementary material for: Umgang mit Desinfektionsmitteln in Kleinbetrieben ausgewählter Branchen in Gesundheitsdienst und Wohlfahrtspflege
Source: Springer Nature journal article supplement (doi:10.1007/s40664-023-00514-z), 2023-08-31
Supplement: MOESM1 [file 25986744]

# Online- Zusatzmaterial

Michaelis M, Anhäuser L, Gerding J, Nienhaus A, Stößel U.

Zum Umgang mit Desinfektionsmitteln in Kleinbetrieben ausgewählter Branchen in Gesundheitsdienst und Wohlfahrtspflege  
[On the handling of disinfectants in small enterprises of selected health and welfare services]

Zentralblatt für Arbeitsmedizin, Arbeitsschutz und Ergonomie 2023

## Inhalt

|                                                                                                            |    |
|------------------------------------------------------------------------------------------------------------|----|
| Tab. S1: Merkmale der Betriebe.....                                                                        | 1  |
| Tab. S2: Einsatz von Desinfektionsmitteln für Hände, Flächen und Arbeitsgeräte .....                       | 2  |
| Tab. S3: Verwendungsform von Flächendesinfektionsmitteln (Mehrfachantworten) .....                         | 3  |
| Tab. S4: Sachgemäßes Umfüllen von Desinfektionsmitteln von größeren Gebinden .....                         | 4  |
| Tab. S5: Persönliche & technische Schutzausrüstung beim Desinfektionsmittelumfüllen .....                  | 5  |
| Tab. S6: Fehler beim Umgang mit Händedesinfektionsmitteln in den letzten sechs Monaten .....               | 6  |
| Tab. S7: Fehler beim Umgang mit Flächendesinfektionsmitteln in den letzten sechs Monaten .....             | 7  |
| Tab. S8: Desinfektionsmittelspezifische Arbeitsschutzqualität .....                                        | 9  |
| Tab. S9: Modalitäten gefahrstoffbezogener Gefährdungsbeurteilungen .....                                   | 10 |
| Tab. S10: Verantwortliche Person für den sicheren Umgang mit Desinfektionsmitteln .....                    | 11 |
| Tab. S11: Information der Beschäftigten zu Händehygiene und sicherem Umgang mit Desinfektionsmitteln ..... | 12 |
| Tab. S12: Modalitäten der Unterweisung, wenn diese erfolgt .....                                           | 13 |
| Tab. S13: Anzahl der Quellen zur Informationsgewinnung von Arbeitsschutzthemen.....                        | 14 |
| Tab. S14: Art der Quellen zur Informationsgewinnung von Arbeitsschutzthemen .....                          | 15 |

## Anmerkungen

In der schriftlichen Befragung wurden die Antworten von Betriebsinhabenden aus fünf Klein- und Kleinstbetrieb-Branchen (KKB) miteinander verglichen *therapeutische Praxen* für Physio-, Logo- und Ergotherapie (TP, n=127), *ambulante Pflegedienste* (AP, n=129), *Friseurstudios* (FRI, n=94), *Kosmetikstudios* inkl. medizinischer Fußpflegepraxen, Nagel- oder Sonnenstudios (KOS, n=32) sowie *Kindertagesstätten* (Kitas, KI; n=90). Der Vergleich erfolgte mittels bivariater

- linearer Regression (Tab. S6, S7 und S13) mit dem Steigungskoeffizient B und dem dazugehörigen Standardfehler von B (Rückwärtselimination der Variablen aus dem Modell), und
- logistischer Regression mit Chancenwert Odds ratio und dem dazugehörigen 95%- Konfidenzintervall (CI). Ambulante Pflegedienste wurden als Referenzkategorie definiert; dies bedeutet eine Zuweisung des Wertes 0 und eine Interpretation der Ergebnisse anderer Branchen relativ zu Pflegediensten. Ein Odds ratio- Wert von 1,0 signalisiert ein gleiches Chancenverhältnis statistischen Unterschied und eine Odds ratio unter 1,0 (in Verbindung mit einem p-Wert unter 0,05) eine geringere Ausprägung des Branchenwertes verglichen mit den Pflegediensten. Die Variablencodierung ist immer 1 „ja“, 0 „nein“.

In den nachfolgenden Tabellen werden die statistischen Kennwerte nur berichtet, wenn mindestens eine der fünf Branchen statistisch auffällig war. Das Signifikanzniveau wurde bei  $p < 0,05$  festgelegt; p-Werte bis 0,1 werden berichtet.

Datenbasis:  $N_{(total)} = 472$  ( $n_{(TP)} = 127$ ,  $n_{(FRI)} = 94$ ,  $n_{(KOS)} = 32$ ,  $n_{(KI)} = 90$ ,  $n_{(AP)} = 129$ )

Abkürzungen in Spalte „Branche“: **AP** = ambulante Pflegedienste; **FRI** = Friseurstudios; **KI** = Kitas (Kindertagesstätten etc.); **KOS** = Kosmetikstudios i. w. S. (incl. med. Fußpflegepraxen, Nagel- oder Sonnenstudios); **TP** = therapeutische Praxen (Physio-, Logo-, Ergotherapie)

**Tab. S1: Merkmale der Betriebe**

|                                                                                                                                                                                                                               | Branche      | Prozent      | (n gültig)   | OR   | CI (95%)  | p      |
|-------------------------------------------------------------------------------------------------------------------------------------------------------------------------------------------------------------------------------|--------------|--------------|--------------|------|-----------|--------|
| Betrieb durch betriebsärztlichen Dienst betreut                                                                                                                                                                               | TP           | 36,8%        | (125)        | 0,09 | 0,05-0,17 | <0,001 |
|                                                                                                                                                                                                                               | FRI          | 33,3%        | (90)         | 0,08 | 0,04-0,15 | <0,001 |
|                                                                                                                                                                                                                               | KOS          | 30,0%        | (30)         | 0,07 | 0,03-0,17 | <0,001 |
|                                                                                                                                                                                                                               | KI           | 22,2%        | (90)         | 0,04 | 0,02-0,09 | <0,001 |
|                                                                                                                                                                                                                               | AP           | 86,6%        | (127)        |      |           |        |
|                                                                                                                                                                                                                               | <b>TOTAL</b> | <b>46,5%</b> | <b>(462)</b> |      |           |        |
| Betrieb durch Fachkraft für Arbeitssicherheit betreut                                                                                                                                                                         | TP           | 52,0%        | (127)        | 0,61 | 0,37-1,01 | 0,054  |
|                                                                                                                                                                                                                               | FRI          | 37,0%        | (92)         | 0,33 | 0,19-0,58 | <0,001 |
|                                                                                                                                                                                                                               | KOS          | 31,3%        | (32)         | 0,26 | 0,11-0,59 | 0,001  |
|                                                                                                                                                                                                                               | KI           | 21,3%        | (89)         | 0,15 | 0,08-0,29 | <0,001 |
|                                                                                                                                                                                                                               | AP           | 64,0%        | (125)        |      |           |        |
|                                                                                                                                                                                                                               | <b>TOTAL</b> | <b>44,9%</b> | <b>(465)</b> |      |           |        |
| <i>Zusammenfassend:<br/>Sicherheitstechnische Betreuung durch eine Fachkraft für Arbeitssicherheit und/oder Teilnahme an alternativer sicherheitstechnischer Betreuung („Unternehmermodell“, sofern &lt; 50 Beschäftigte)</i> | TP           | 64,6%        | (127)        |      |           |        |
|                                                                                                                                                                                                                               | FRI          | 74,2%        | (93)         |      |           |        |
|                                                                                                                                                                                                                               | KOS          | 40,6%        | (32)         |      |           |        |
|                                                                                                                                                                                                                               | KI           | 43,8%        | (89)         |      |           |        |
|                                                                                                                                                                                                                               | AP           | 67,2%        | (128)        |      |           |        |
|                                                                                                                                                                                                                               | <b>TOTAL</b> | <b>61,6%</b> | <b>(469)</b> |      |           |        |
| Qualitätsmanagement                                                                                                                                                                                                           | TP           | 17,7%        | (124)        | 0,00 | 0,00-0,02 | <0,001 |
|                                                                                                                                                                                                                               | FRI          | 19,3%        | (88)         | 0,00 | 0,00-0,02 | <0,001 |
|                                                                                                                                                                                                                               | KOS          | 23,3%        | (30)         | 0,00 | 0,00-0,02 | <0,001 |
|                                                                                                                                                                                                                               | KI           | 18,8%        | (85)         | 0,00 | 0,00-0,02 | <0,001 |
|                                                                                                                                                                                                                               | AP           | 98,4%        | (127)        |      |           |        |
|                                                                                                                                                                                                                               | <b>TOTAL</b> | <b>41,2%</b> | <b>(454)</b> |      |           |        |
| Besuch von der BGW in den letzten zwei Jahren                                                                                                                                                                                 | TP           | 11,7%        | (120)        |      |           |        |
|                                                                                                                                                                                                                               | FRI          | 12,9%        | (85)         |      |           |        |
|                                                                                                                                                                                                                               | KOS          | 14,3%        | (28)         |      |           |        |
|                                                                                                                                                                                                                               | KI           | 5,7%         | (87)         |      |           |        |
|                                                                                                                                                                                                                               | AP           | 16,9%        | (118)        |      |           |        |
|                                                                                                                                                                                                                               | <b>TOTAL</b> | <b>12,3%</b> | <b>(438)</b> |      |           |        |

Legende:

Abkürzungen (allgemein): BGW = Berufsgenossenschaft für Gesundheitsdienst und Wohlfahrtspflege.

Abkürzungen (statistisch): n = Anzahl; OR = Odds ratio; p = Signifikanzwert; – nicht signifikant ( $p \geq 0,05$ ; p bis 0,1 dargestellt); / = keine Branchenunterschiede ( $p > 0,05$ )

Ergebnisse bivariater logistischer Regressionsanalysen.

Datenbasis:  $N_{(total)} 472$  ( $n_{(TP)} = 127$ ,  $n_{(FRI)} = 94$ ,  $n_{(KOS)} = 32$ ,  $n_{(KI)} = 90$ ,  $n_{(AP)} = 129$ )

**Tab. S2: Einsatz von Desinfektionsmitteln für Hände, Flächen und Arbeitsgeräte**

|                                                               | Branche      | Händedesinfektion                                                                                                                                                      |              |      |           |                | Flächendesinfektion                                                                                                                                                    |              |      |            |                | Arbeitsgerätedesinfektion                                                                                                                                              |              |       |            |                |
|---------------------------------------------------------------|--------------|------------------------------------------------------------------------------------------------------------------------------------------------------------------------|--------------|------|-----------|----------------|------------------------------------------------------------------------------------------------------------------------------------------------------------------------|--------------|------|------------|----------------|------------------------------------------------------------------------------------------------------------------------------------------------------------------------|--------------|-------|------------|----------------|
|                                                               |              | %                                                                                                                                                                      | n(gültig)    | OR   | CI (95%)  | P              | %                                                                                                                                                                      | n(gültig)    | OR   | CI (95%)   | p              | %                                                                                                                                                                      | n(gültig)    | OR    | CI (95%)   | p              |
| Einsatz eines Desinfektionsmittels <sup>1)</sup>              | TP           | 99,2%                                                                                                                                                                  | (127)        |      |           |                | 95,2%                                                                                                                                                                  | (126)        |      |            |                | 70,1%                                                                                                                                                                  | (127)        | 2,88  | 1,72-4,82  | <0,001         |
|                                                               | FRI          | 100,0%                                                                                                                                                                 | (94)         |      |           |                | 92,5%                                                                                                                                                                  | (93)         |      |            |                | 93,4%                                                                                                                                                                  | (91)         | 17,40 | 7,08-42,74 | <0,001         |
|                                                               | KOS          | 100,0%                                                                                                                                                                 | (32)         |      |           |                | 100,0%                                                                                                                                                                 | (32)         |      |            |                | 90,6%                                                                                                                                                                  | (32)         | 11,87 | 3,44-40,98 | <0,001         |
|                                                               | KI           | 96,7%                                                                                                                                                                  | (90)         |      |           |                | 94,3%                                                                                                                                                                  | (87)         |      |            |                | 39,3%                                                                                                                                                                  | (89)         | 0,80  | 0,46-1,38  | -              |
|                                                               | AP           | 100,0%                                                                                                                                                                 | (129)        |      |           |                | 93,8%                                                                                                                                                                  | (128)        |      |            |                | 44,9%                                                                                                                                                                  | (127)        |       |            |                |
|                                                               | <b>TOTAL</b> | <b>99,2%</b>                                                                                                                                                           | <b>(472)</b> |      |           |                | <b>94,4%</b>                                                                                                                                                           | <b>(466)</b> |      |            |                | <b>63,3%</b>                                                                                                                                                           | <b>(466)</b> |       |            |                |
| <i>Wenn ja: Einsatzmodalitäten</i>                            |              | <i>(Datenbasis: n<sub>(total)</sub> = 440 (n<sub>(TP)</sub> = 126, n<sub>(FRI)</sub> = 93, n<sub>(KOS)</sub> = 32, n<sub>(KI)</sub> = 87, n<sub>(AP)</sub> = 128))</i> |              |      |           |                | <i>(Datenbasis: n<sub>(total)</sub> = 440 (n<sub>(TP)</sub> = 126, n<sub>(FRI)</sub> = 93, n<sub>(KOS)</sub> = 32, n<sub>(KI)</sub> = 87, n<sub>(AP)</sub> = 128))</i> |              |      |            |                | <i>(Datenbasis: n<sub>(total)</sub> = 295 (n<sub>(TP)</sub> = 127, n<sub>(FRI)</sub> = 91, n<sub>(KOS)</sub> = 32, n<sub>(KI)</sub> = 89, n<sub>(AP)</sub> = 127))</i> |              |       |            |                |
| Einsatz bereits vor der Beginn der Pandemie (vs. seit Beginn) | TP           | 94,4%                                                                                                                                                                  | (126)        |      |           |                | 88,3%                                                                                                                                                                  | 120          | 2,51 | 0,93-6,77  | 0,069          | 95,5%                                                                                                                                                                  | (88)         |       |            |                |
|                                                               | FRI          | 66,7%                                                                                                                                                                  | (93)         |      |           |                | 67,4%                                                                                                                                                                  | (86)         | 9,17 | 3,59-23,40 | <0,001         | 91,6%                                                                                                                                                                  | (83)         |       |            |                |
|                                                               | KOS          | 87,5%                                                                                                                                                                  | (32)         |      |           |                | 90,6%                                                                                                                                                                  | (32)         | 1,97 | 0,46-8,33  | -              | 96,6%                                                                                                                                                                  | (29)         |       |            |                |
|                                                               | KI           | 94,3%                                                                                                                                                                  | (87)         |      |           |                | 94,0%                                                                                                                                                                  | (84)         | 1,20 | 0,35-4,08  | -              | 90,9%                                                                                                                                                                  | (33)         |       |            |                |
|                                                               | AP           | 100,0%                                                                                                                                                                 | (128)        |      |           |                | 95,0%                                                                                                                                                                  | (120)        |      |            |                | 96,4%                                                                                                                                                                  | (56)         |       |            |                |
|                                                               | <b>TOTAL</b> | <b>89,9%</b>                                                                                                                                                           | <b>(466)</b> |      |           |                | <b>87,3%</b>                                                                                                                                                           | <b>(442)</b> |      |            |                | <b>94,1%</b>                                                                                                                                                           | <b>(289)</b> |       |            |                |
| Desinfektionsmittel viruzid <sup>2)</sup>                     | TP           | 98,0%                                                                                                                                                                  | (100)        |      |           |                | 96,6%                                                                                                                                                                  | (89)         |      |            |                | 97,2%                                                                                                                                                                  | (71)         |       |            |                |
|                                                               | FRI          | 93,7%                                                                                                                                                                  | (63)         |      |           |                | 94,4%                                                                                                                                                                  | (54)         |      |            |                | 90,2%                                                                                                                                                                  | (51)         |       |            |                |
|                                                               | KOS          | 95,5%                                                                                                                                                                  | (22)         |      |           |                | 87,5%                                                                                                                                                                  | (24)         |      |            |                | 85,0%                                                                                                                                                                  | (20)         |       |            |                |
|                                                               | KI           | 96,9%                                                                                                                                                                  | (64)         |      |           |                | 100,0%                                                                                                                                                                 | (61)         |      |            |                | 100,0%                                                                                                                                                                 | (16)         |       |            |                |
|                                                               | AP           | 99,1%                                                                                                                                                                  | (106)        |      |           |                | 97,7%                                                                                                                                                                  | (88)         |      |            |                | 100,0%                                                                                                                                                                 | (41)         |       |            |                |
|                                                               | <b>TOTAL</b> | <b>97,2%</b>                                                                                                                                                           | <b>(355)</b> |      |           |                | <b>96,5%</b>                                                                                                                                                           | <b>(316)</b> |      |            |                | <b>95,0%</b>                                                                                                                                                           | <b>(199)</b> |       |            |                |
| Einkaufsquelle Fachhandel <sup>3)</sup>                       | TP           | 87,1%                                                                                                                                                                  | (124)        | 0,39 | 0,15-0,99 | <b>0,046</b>   | 87,4%                                                                                                                                                                  | 111          | 0,25 | 0,08-0,77  | <b>0,016</b>   | 87,4%                                                                                                                                                                  | (87)         | 0,12  | 0,02-0,98  | <b>0,048</b>   |
|                                                               | FRI          | 73,9%                                                                                                                                                                  | (92)         | 0,16 | 0,07-0,40 | < <b>0,001</b> | 74,7%                                                                                                                                                                  | (75)         | 0,10 | 0,03-0,32  | < <b>0,001</b> | 73,5%                                                                                                                                                                  | (83)         | 0,05  | 0,01-0,38  | <b>0,004</b>   |
|                                                               | KOS          | 78,1%                                                                                                                                                                  | (32)         | 0,21 | 0,07-0,64 | <b>0,006</b>   | 89,3%                                                                                                                                                                  | (28)         | 0,29 | 0,06-1,40  | -              | 82,8%                                                                                                                                                                  | (29)         | 0,09  | 0,01-0,77  | <b>0,029</b>   |
|                                                               | KI           | 49,4%                                                                                                                                                                  | (87)         | 0,06 | 0,03-0,15 | < <b>0,001</b> | 46,3%                                                                                                                                                                  | (80)         | 0,03 | 0,01-0,09  | < <b>0,001</b> | 44,1%                                                                                                                                                                  | (34)         | 0,01  | 0,00-0,11  | < <b>0,001</b> |
|                                                               | AP           | 94,5%                                                                                                                                                                  | (128)        |      |           |                | 96,6%                                                                                                                                                                  | (117)        |      |            |                | 98,2%                                                                                                                                                                  | (57)         |       |            |                |
|                                                               | <b>TOTAL</b> | <b>78,8%</b>                                                                                                                                                           | <b>(463)</b> |      |           |                | <b>79,8%</b>                                                                                                                                                           | <b>(411)</b> |      |            |                | <b>80,0%</b>                                                                                                                                                           | <b>(290)</b> |       |            |                |

Legende: Abkürzungen siehe Tab. 1. <sup>1)</sup> Kein Betrieb verwendete gar keine Desinfektionsmittel; <sup>2)</sup> Abgeleitet aus dem angegebenen Handelsnamen; keine Angabe wurde als „nein“ interpretiert; wenn mehrere Mittel angegeben: mindestens eines viruzid; <sup>3)</sup> Hersteller, Lieferant anderer Arbeitsprodukte, Apotheke etc. vs. Supermarkt, Drogerie, Internethändler. *Datenbasis: N<sub>(total)</sub> 472 (n<sub>(TP)</sub> = 127, n<sub>(FRI)</sub> = 94, n<sub>(KOS)</sub> = 32, n<sub>(KI)</sub> = 90, n<sub>(AP)</sub> = 129)*

Abkürzungen in Spalte „Branche“: **AP** = ambulante Pflegedienste; **FRI** = Friseurstudios; **KI** = Kitas (Kindertagesstätten etc.); **KOS** = Kosmetikstudios i. w. S. (incl. med. Fußpflegepraxen, Nagel- oder Sonnenstudios); **TP** = therapeutische Praxen (Physio-, Logo-, Ergotherapie)

**Tab. S3: Verwendungsform von Flächendesinfektionsmitteln (Mehrfachantworten)**

| Branche      | Wipes        |            |      |           |        | Tuchspendersysteme |            |    |          |   | Gebrauchsfertige Flaschen/Spender |            |      |           |        |
|--------------|--------------|------------|------|-----------|--------|--------------------|------------|----|----------|---|-----------------------------------|------------|------|-----------|--------|
|              | %            | n(gültig)  | OR   | CI (95%)  | p      | %                  | n(gültig)  | OR | CI (95%) | p | %                                 | n(gültig)  | OR   | CI (95%)  | p      |
| TP           | 28,6%        | 119        | 0,28 | 0,16-0,47 | <0,001 | 8,4%               | 119        |    |          |   | 44,5%                             | 119        | 0,33 | 0,19-0,56 | <0,001 |
| FRI          | 18,6%        | 86         | 0,16 | 0,08-0,30 | <0,001 | 7,0%               | 86         |    |          |   | 66,3%                             | 86         | 0,81 | 0,45-1,47 | –      |
| KOS          | 46,9%        | 32         | 0,61 | 0,28-1,33 | –      | 12,5%              | 32         |    |          |   | 62,5%                             | 32         | 0,69 | 0,30-1,55 | –      |
| KI           | 39,3%        | 84         | 0,45 | 0,25-0,79 | 0,006  | 9,5%               | 84         |    |          |   | 60,7%                             | 84         | 0,64 | 0,35-1,15 | –      |
| AP           | 59,2%        | 120        |      |           |        | 15,8%              | 120        |    |          |   | 70,8%                             | 120        |      |           |        |
| <b>TOTAL</b> | <b>38,3%</b> | <b>441</b> |      |           |        | <b>10,7%</b>       | <b>441</b> |    |          |   | <b>60,3%</b>                      | <b>441</b> |      |           |        |

**Zusammenfassend: Wipes / Tuchspendersysteme**

| Branche      | %            | n(gültig)  | OR   | CI (95%)  | p      |
|--------------|--------------|------------|------|-----------|--------|
| TP           | 33,6%        | 119        | 0,33 | 0,19-0,55 | <0,001 |
| FRI          | 19,8%        | 86         | 0,16 | 0,08-0,30 | <0,001 |
| KOS          | 46,9%        | 32         | 0,57 | 0,26-1,25 | –      |
| KI           | 44,0%        | 84         | 0,51 | 0,29-0,89 | 0,019  |
| AP           | 60,8%        | 120        |      |           |        |
| <b>TOTAL</b> | <b>41,3%</b> | <b>441</b> |      |           |        |

Legende: Abkürzungen siehe Tab. 1

Datenbasis:  $N_{(total)} 472$  ( $n_{(TP)} = 127$ ,  $n_{(FRI)} = 94$ ,  $n_{(KOS)} = 32$ ,  $n_{(KI)} = 90$ ,  $n_{(AP)} = 129$ )

**Tab. S4: Sachgemäßes Umfüllen von Desinfektionsmitteln von größeren Gebinden**

|                                                                                                                                     | Branche      | Händedesinfektion                                                                                                                                        |              |      |           |              | Flächendesinfektion                                                                                                                                      |              |      |            |              | Arbeitsgerätedesinfektion                                                                                                                              |              |      |            |        |
|-------------------------------------------------------------------------------------------------------------------------------------|--------------|----------------------------------------------------------------------------------------------------------------------------------------------------------|--------------|------|-----------|--------------|----------------------------------------------------------------------------------------------------------------------------------------------------------|--------------|------|------------|--------------|--------------------------------------------------------------------------------------------------------------------------------------------------------|--------------|------|------------|--------|
|                                                                                                                                     |              | %                                                                                                                                                        | n(gültig)    | OR   | CI (95%)  | P            | %                                                                                                                                                        | n(gültig)    | OR   | CI (95%)   | p            | %                                                                                                                                                      | n(gültig)    | OR   | CI (95%)   | p      |
| Zur Information:                                                                                                                    | TP           | 49,2%                                                                                                                                                    | (126)        | 5,46 | 2,99-9,94 | <0,001       | 58,0%                                                                                                                                                    | (119)        | 8,36 | 4,46-15,68 | <0,001       | 48,3%                                                                                                                                                  | (89)         | 5,73 | 2,43-13,47 | <0,001 |
| Umfüllen für den Gebrauch nach Einkauf erforderlich <sup>1)</sup>                                                                   | FRI          | 43,0%                                                                                                                                                    | (93)         | 4,25 | 2,25-8,04 | <0,001       | 43,0%                                                                                                                                                    | (86)         | 4,58 | 2,35-8,92  | <0,001       | 38,8%                                                                                                                                                  | (85)         | 3,89 | 1,64-9,24  | 0,002  |
|                                                                                                                                     | KOS          | 15,6%                                                                                                                                                    | (32)         | 1,04 | 0,36-3,05 | –            | 37,5%                                                                                                                                                    | (32)         | 3,64 | 1,51-8,77  | 0,004        | 51,7%                                                                                                                                                  | (29)         | 6,56 | 2,31-18,63 | <0,001 |
|                                                                                                                                     | KI           | 34,1%                                                                                                                                                    | (85)         | 2,92 | 1,50-5,66 | 0,002        | 27,4%                                                                                                                                                    | (84)         | 2,28 | 1,13-4,61  | 0,021        | 25,7%                                                                                                                                                  | (35)         | 2,12 | 0,73-6,15  | –      |
|                                                                                                                                     | AP           | 15,1%                                                                                                                                                    | (126)        |      |           |              | 14,2%                                                                                                                                                    | (120)        |      |            |              | 14,0%                                                                                                                                                  | (57)         |      |            |        |
|                                                                                                                                     | <b>TOTAL</b> | <b>33,5%</b>                                                                                                                                             | <b>(462)</b> |      |           |              | <b>35,8%</b>                                                                                                                                             | <b>(441)</b> |      |            |              | <b>36,6%</b>                                                                                                                                           | <b>(295)</b> |      |            |        |
| <i>Wenn Umfüllen erfolgt:</i>                                                                                                       |              | <i>Datenbasis: N (total) = 158 (n<sub>(TP)</sub> = 69, n<sub>(FRI)</sub> = 37, n<sub>(KOS)</sub> = 12, n<sub>(KI)</sub> = 23, n<sub>(AP)</sub> = 17)</i> |              |      |           |              | <i>Datenbasis: N (total) = 158 (n<sub>(TP)</sub> = 69, n<sub>(FRI)</sub> = 37, n<sub>(KOS)</sub> = 12, n<sub>(KI)</sub> = 23, n<sub>(AP)</sub> = 17)</i> |              |      |            |              | <i>Datenbasis: N (total) = 108 (n<sub>(TP)</sub> = 43, n<sub>(FRI)</sub> = 33, n<sub>(KOS)</sub> = 15, n<sub>(KI)</sub> = 9, n<sub>(AP)</sub> = 8)</i> |              |      |            |        |
| Vollständige erforderliche Kennzeichnung der Spenderflaschen <sup>2)</sup>                                                          | TP           | 64,4%                                                                                                                                                    | (59)         |      |           |              | 63,6%                                                                                                                                                    | (66)         | 1,17 | 0,37-3,68  | –            | 71,8%                                                                                                                                                  | (39)         |      |            |        |
|                                                                                                                                     | FRI          | 81,1%                                                                                                                                                    | (37)         |      |           |              | 93,8%                                                                                                                                                    | (32)         | 10,0 | 1,71-58,43 | 0,011        | 83,3%                                                                                                                                                  | (24)         |      |            |        |
|                                                                                                                                     | KOS          | 60,0%                                                                                                                                                    | (5)          |      |           |              | 81,8%                                                                                                                                                    | (11)         | 3,00 | 0,47-19,04 | –            | 88,9%                                                                                                                                                  | (9)          |      |            |        |
|                                                                                                                                     | KI           | 65,4%                                                                                                                                                    | (26)         |      |           |              | 71,4%                                                                                                                                                    | (21)         | 1,67 | 0,41-6,77  | –            | 71,4%                                                                                                                                                  | (7)          |      |            |        |
|                                                                                                                                     | AP           | 78,9%                                                                                                                                                    | (19)         |      |           |              | 60,0%                                                                                                                                                    | (15)         |      |            |              | 100,0%                                                                                                                                                 | (5)          |      |            |        |
| <b>TOTAL</b>                                                                                                                        | <b>70,5%</b> | <b>(146)</b>                                                                                                                                             |              |      |           | <b>72,4%</b> | <b>(145)</b>                                                                                                                                             |              |      |            | <b>78,6%</b> | <b>(84)</b>                                                                                                                                            |              |      |            |        |
| Verwendung von Schutzausrüstung (Schutzkleidung, Schutzhandschuhe, Augenschutz, Trichter, Dosierhilfe); mindestens eines angekreuzt | TP           | 93,5%                                                                                                                                                    | (62)         |      |           |              | 91,3%                                                                                                                                                    | (69)         |      |            |              | 90,7%                                                                                                                                                  | (43)         |      |            |        |
|                                                                                                                                     | FRI          | 92,5%                                                                                                                                                    | (40)         |      |           |              | 94,6%                                                                                                                                                    | (37)         |      |            |              | 84,8%                                                                                                                                                  | (33)         |      |            |        |
|                                                                                                                                     | KOS          | 100,0%                                                                                                                                                   | (5)          |      |           |              | 91,7%                                                                                                                                                    | (12)         |      |            |              | 80,0%                                                                                                                                                  | (15)         |      |            |        |
|                                                                                                                                     | KI           | 82,8%                                                                                                                                                    | (29)         |      |           |              | 78,3%                                                                                                                                                    | (23)         |      |            |              | 77,8%                                                                                                                                                  | (9)          |      |            |        |
|                                                                                                                                     | AP           | 89,5%                                                                                                                                                    | (19)         |      |           |              | 94,1%                                                                                                                                                    | (17)         |      |            |              | 87,5%                                                                                                                                                  | (8)          |      |            |        |
| <b>TOTAL</b>                                                                                                                        | <b>91,0%</b> | <b>(155)</b>                                                                                                                                             |              |      |           | <b>90,5%</b> | <b>(158)</b>                                                                                                                                             |              |      |            | <b>86,1%</b> | <b>(108)</b>                                                                                                                                           |              |      |            |        |

Legende: Abkürzungen siehe Tab. 1.

<sup>1)</sup> größeres Gebinde bzw. bei Flächen- und Arbeitsgeräte-Desinfektionsmitteln auch als Konzentrat vs. gebrauchsfertige Flaschen/Spender

<sup>2)</sup> Kennzeichnung mit Handelsnamen und weitere Sicherheitsinformationen vs. Handelsname ohne weitere Sicherheitsinformationen, gar keine oder unbestimmte Kennzeichnung, nur Verfallsdatum

Datenbasis: N (total) 472 (n<sub>(TP)</sub> = 127, n<sub>(FRI)</sub> = 94, n<sub>(KOS)</sub> = 32, n<sub>(KI)</sub> = 90, n<sub>(AP)</sub> = 129)

**Tab. S5: Persönliche & technische Schutzausrüstung beim Umfüllen von Desinfektionsmitteln**

| Branche              |              | Händedesinfektion |              |      |           |                  | Flächendesinfektion |              |      |           |                  |
|----------------------|--------------|-------------------|--------------|------|-----------|------------------|---------------------|--------------|------|-----------|------------------|
|                      |              | %                 | n(gültig)    | OR   | CI (95%)  | p                | %                   | n(gültig)    | OR   | CI (95%)  | p                |
| Schutzkleidung (P)   | TP           | 6,5%              | (62)         | 0,06 | 0,02-0,25 | <b>&lt;0,001</b> | 5,8%                | (69)         | 0,07 | 0,02-0,28 | <b>&lt;0,001</b> |
|                      | FRI          | 20,5%             | (39)         | 0,23 | 0,07-0,78 | <b>0,019</b>     | 18,9%               | (37)         | 0,26 | 0,07-0,92 | <b>0,037</b>     |
|                      | KOS          | 20,0%             | (5)          | 0,22 | 0,02-2,42 | –                | 16,7%               | (12)         | 0,23 | 0,04-1,35 | –                |
|                      | KI           | 0,0%              | (27)         | ---  | ---       | ---              | 0,0%                | (23)         | ---  | ---       | ---              |
|                      | AP           | 52,9%             | (17)         |      |           |                  | 47,1%               | (17)         |      |           |                  |
|                      | <b>TOTAL</b> | <b>14,7%</b>      | <b>(150)</b> |      |           |                  | <b>13,3%</b>        | <b>(158)</b> |      |           |                  |
| Schutzhandschuhe (P) | TP           | 59,7%             | (62)         | 0,09 | 0,01-0,74 | <b>0,025</b>     | 68,1%               | (69)         |      |           |                  |
|                      | FRI          | 76,9%             | (39)         | 0,21 | 0,02-1,79 | –                | 78,4%               | (37)         |      |           |                  |
|                      | KOS          | 100,0%            | (5)          | ---  | ---       | –                | 91,7%               | (12)         |      |           |                  |
|                      | KI           | 63,0%             | (27)         | 0,11 | 0,01-0,93 | <b>0,042</b>     | 60,9%               | (23)         |      |           |                  |
|                      | AP           | 94,1%             | (17)         |      |           |                  | 82,4%               | (17)         |      |           |                  |
|                      | <b>TOTAL</b> | <b>70,0%</b>      | <b>(150)</b> |      |           |                  | <b>72,8%</b>        | <b>(158)</b> |      |           |                  |
| Augenschutz (P)      | TP           | 32,3%             | (62)         | 0,33 | 0,11-1,00 | 0,051            | 34,8%               | (69)         | 0,29 | 0,10-0,88 | <b>0,029</b>     |
|                      | FRI          | 20,5%             | (39)         | 0,18 | 0,05-0,62 | <b>0,007</b>     | 21,6%               | (37)         | 0,15 | 0,040,53  | <b>0,003</b>     |
|                      | KOS          | 60,0%             | (5)          | 1,05 | 0,14-8,02 | –                | 58,3%               | (12)         | 0,76 | 0,17-3,49 | –                |
|                      | KI           | 14,8%             | (27)         | 0,12 | 0,03-0,51 | <b>0,004</b>     | 13,0%               | (23)         | 0,08 | 0,02-0,39 | <b>0,002</b>     |
|                      | AP           | 58,8%             | (17)         |      |           |                  | 64,7%               | (17)         |      |           |                  |
|                      | <b>TOTAL</b> | <b>30,0%</b>      | <b>(150)</b> |      |           |                  | <b>33,5%</b>        | <b>(158)</b> |      |           |                  |
| Trichter (T)         | TP           | 72,6%             | (62)         |      |           |                  | 69,6%               | (69)         |      |           |                  |
|                      | FRI          | 71,8%             | (39)         |      |           |                  | 75,7%               | (37)         |      |           |                  |
|                      | KOS          | 80,0%             | (5)          |      |           |                  | 66,7%               | (12)         |      |           |                  |
|                      | KI           | 70,4%             | (27)         |      |           |                  | 56,5%               | (23)         |      |           |                  |
|                      | AP           | 70,6%             | (17)         |      |           |                  | 52,9%               | (17)         |      |           |                  |
|                      | <b>TOTAL</b> | <b>72,0%</b>      | <b>(150)</b> |      |           |                  | <b>67,1%</b>        | <b>(158)</b> |      |           |                  |
| Dosierhilfe (T)      | TP           | 21,0%             | (62)         | 0,19 | 0,06-0,58 | <b>0,004</b>     | 31,9%               | (69)         | 0,26 | 0,08-0,78 | <b>0,017</b>     |
|                      | FRI          | 25,6%             | (39)         | 0,24 | 0,07-0,80 | <b>0,021</b>     | 35,1%               | (37)         | 0,30 | 0,09-0,98 | <b>0,047</b>     |
|                      | KOS          | 60,0%             | (5)          | 1,05 | 0,14-8,02 | –                | 58,3%               | (12)         | 0,76 | 0,17-3,49 | –                |
|                      | KI           | 14,8%             | (27)         | 0,12 | 0,03-0,51 | <b>0,004</b>     | 26,1%               | (23)         | 0,19 | 0,05-0,75 | <b>0,018</b>     |
|                      | AP           | 58,8%             | (17)         |      |           |                  | 64,7%               | (17)         |      |           |                  |
|                      | <b>TOTAL</b> | <b>26,7%</b>      | <b>(150)</b> |      |           |                  | <b>37,3%</b>        | <b>(158)</b> |      |           |                  |

Legende: Abkürzungen: Siehe Tab. 1: P = persönliche, T = technische Schutzausrüstung.

Anmerkung: Frage im Zusammenhang mit Arbeitsmitteldesinfektion nicht erfragt

Datenbasis: N (total) 150 (n (TP) = 62, n (FRI) = 39, n (KOS) = 5, n (KI) = 27, n (AP) = 17), wenn Umfüllen erfolgt und mindestens ein Schutzmittel angegeben wurde

Abkürzungen in Spalte „Branche“: **AP** = ambulante Pflegedienste; **FRI** = Friseurstudios; **KI** = Kitas (Kindertagesstätten etc.); **KOS** = Kosmetikstudios i. w. S. (incl. med. Fußpflegepraxen, Nagel- oder Sonnenstudios); **TP** = therapeutische Praxen (Physio-, Logo-, Ergotherapie)

**Tab. S6: Fehler beim Umgang mit Händedesinfektionsmitteln in den letzten sechs Monaten**

|                                                      | Branche      | sehr häufig | eher häufig | eher selten  | nie          | n (gültig)   |
|------------------------------------------------------|--------------|-------------|-------------|--------------|--------------|--------------|
| 1. Vergessen, den Spender aufzufüllen                | TP           | 0,0%        | 0,8%        | 9,5%         | 89,7%        | (126)        |
|                                                      | FRI          | 1,1%        | 0,0%        | 10,9%        | 88,0%        | (92)         |
|                                                      | KOS          | 0,0%        | 0,0%        | 15,6%        | 84,4%        | (32)         |
|                                                      | KI           | 1,1%        | 0,0%        | 10,3%        | 88,5%        | (87)         |
|                                                      | AP           | 0,0%        | 0,0%        | 19,0%        | 81,0%        | (121)        |
|                                                      | <b>TOTAL</b> | <b>0,4%</b> | <b>0,2%</b> | <b>12,9%</b> | <b>86,5%</b> | <b>(458)</b> |
| 2. Hände- und Flächendesinfektionsmittel verwechselt | TP           | 0,0%        | 0,8%        | 9,1%         | 90,1%        | (121)        |
|                                                      | FRI          | 0,0%        | 0,0%        | 8,8%         | 91,2%        | (91)         |
|                                                      | KOS          | 0,0%        | 3,2%        | 3,2%         | 93,5%        | (31)         |
|                                                      | KI           | 0,0%        | 0,0%        | 8,0%         | 92,0%        | (87)         |
|                                                      | AP           | 0,0%        | 0,0%        | 12,1%        | 87,9%        | (124)        |
|                                                      | <b>TOTAL</b> | <b>0,0%</b> | <b>0,4%</b> | <b>9,3%</b>  | <b>90,3%</b> | <b>(454)</b> |

**Ergebnisse für Regressionsanalyse (Mittelwerte)**

|                                                      | Branche      | MW (SD)            | Spanne     | B | SE | p |
|------------------------------------------------------|--------------|--------------------|------------|---|----|---|
| 1. Vergessen, den Spender aufzufüllen                | TP           | 1,11 (0,34)        | 1-3        |   |    |   |
|                                                      | FRI          | 1,14 (0,43)        | 1-4        |   |    |   |
|                                                      | KOS          | 1,16 (0,37)        | 1-2        |   |    |   |
|                                                      | KI           | 1,14 (0,44)        | 1-4        |   |    |   |
|                                                      | AP           | 1,19 (0,39)        | 1-2        |   |    |   |
|                                                      | <b>TOTAL</b> | <b>1,15 (0,39)</b> | <b>1-4</b> |   |    |   |
| 2. Hände- und Flächendesinfektionsmittel verwechselt | TP           | 1,11 (0,34)        | 1-3        |   |    |   |
|                                                      | FRI          | 1,09 (0,28)        | 1-2        |   |    |   |
|                                                      | KOS          | 1,10 (0,40)        | 1-3        |   |    |   |
|                                                      | KI           | 1,08 (0,27)        | 1-2        |   |    |   |
|                                                      | AP           | 1,12 (0,33)        | 1-2        |   |    |   |
|                                                      | <b>TOTAL</b> | <b>1,10 (0,32)</b> | <b>1-3</b> |   |    |   |

Legende: Abkürzungen: B = Regressionskoeffizient; MW = Mittelwert; n = Anzahl; ns= nicht signifikant; p = Signifikanzwert; SD = Standardabweichung; SE = Standardfehler von B

Wenn Aspekt zutrifft; standardisierte Aussagen aus der subjektiven Erfahrung der Befragten. Ergebnis bivariater linearer Regressionsanalysen

Mögliche Werte 1 = nie, 2 = eher selten, 3 = eher häufig, 4 = sehr häufig

Konstante des Regressionsmodells (Aspekte 1-2):

1. B = 1,15 (SD 0,18);  $R^2 = <0,001$
2. B = 1,10 (SD 0,15);  $R^2 = <0,001$ ; p = <0,001 (beide Modelle).

Datenbasis (gültige Antworten, Aspekte 1-2):

1.  $n_{(TP)} = 126$ ,  $n_{(FRI)} = 94$ ,  $n_{(KOS)} = 32$ ,  $n_{(KI)} = 87$ ,  $n_{(AP)} = 129$
2.  $n_{(TP)} = 120$ ,  $n_{(FRI)} = 86$ ,  $n_{(KOS)} = 32$ ,  $n_{(KI)} = 85$ ,  $n_{(AP)} = 120$

**Tab. S7: Fehler beim Umgang mit Flächendesinfektionsmitteln in den letzten sechs Monaten**

|                                                                                                                                                                            | Branche | sehr häufig  | eher häufig | eher selten  | nie          | n (gültig)   |
|----------------------------------------------------------------------------------------------------------------------------------------------------------------------------|---------|--------------|-------------|--------------|--------------|--------------|
| 1. Mittel gesprüht statt gewischt                                                                                                                                          | TP      | 0,9%         | 3,6%        | 31,3%        | 64,3%        | (112)        |
|                                                                                                                                                                            | FRI     | 6,2%         | 1,2%        | 27,2%        | 65,4%        | (81)         |
|                                                                                                                                                                            | KOS     | 3,1%         | 3,1%        | 21,9%        | 71,9%        | (32)         |
|                                                                                                                                                                            | KI      | 4,9%         | 9,8%        | 29,3%        | 56,1%        | (82)         |
|                                                                                                                                                                            | AP      | 0,0%         | 5,3%        | 25,7%        | 69,0%        | (113)        |
|                                                                                                                                                                            |         |              | <b>2,6%</b> | <b>4,8%</b>  | <b>27,9%</b> | <b>64,8%</b> |
| 2. Flächendesinfektions- und Reinigungsmittel gemischt                                                                                                                     | TP      | 0,9%         | 0,0%        | 8,8%         | 90,4%        | (114)        |
|                                                                                                                                                                            | FRI     | 1,2%         | 0,0%        | 7,3%         | 91,5%        | (82)         |
|                                                                                                                                                                            | KOS     | 3,2%         | 0,0%        | 6,5%         | 90,3%        | (31)         |
|                                                                                                                                                                            | KI      | 2,4%         | 3,6%        | 4,8%         | 89,2%        | (83)         |
|                                                                                                                                                                            | AP      | 0,0%         | 0,9%        | 0,9%         | 98,3%        | (117)        |
|                                                                                                                                                                            |         | <b>TOTAL</b> | <b>1,2%</b> | <b>0,9%</b>  | <b>5,4%</b>  | <b>92,5%</b> |
| 3. Keine Handschuhe getragen                                                                                                                                               | TP      | 10,8%        | 19,6%       | 37,3%        | 32,4%        | (102)        |
|                                                                                                                                                                            | FRI     | 1,2%         | 10,8%       | 42,2%        | 45,8%        | (83)         |
|                                                                                                                                                                            | KOS     | 0,0%         | 3,3%        | 20,0%        | 76,7%        | (30)         |
|                                                                                                                                                                            | KI      | 8,4%         | 20,5%       | 33,7%        | 37,3%        | (83)         |
|                                                                                                                                                                            | AP      | 0,9%         | 2,6%        | 28,1%        | 68,4%        | (114)        |
|                                                                                                                                                                            |         | <b>TOTAL</b> | <b>4,9%</b> | <b>12,1%</b> | <b>33,7%</b> | <b>49,3%</b> |
| 4. Einwirkzeit nicht beachtet                                                                                                                                              | TP      | 0,0%         | 7,2%        | 55,0%        | 37,8%        | (111)        |
|                                                                                                                                                                            | FRI     | 3,8%         | 7,6%        | 48,1%        | 40,5%        | (79)         |
|                                                                                                                                                                            | KOS     | 0,0%         | 3,3%        | 36,7%        | 60,0%        | (30)         |
|                                                                                                                                                                            | KI      | 2,5%         | 5,0%        | 45,0%        | 47,5%        | (80)         |
|                                                                                                                                                                            | AP      | 0,0%         | 0,9%        | 46,3%        | 52,8%        | (108)        |
|                                                                                                                                                                            |         | <b>TOTAL</b> | <b>1,2%</b> | <b>4,9%</b>  | <b>48,0%</b> | <b>45,8%</b> |
| 5. Konzentrat falsch verdünnt, falls verwendet (Datenbasis: $n_{(total)} = 49$ ( $n_{(TP)} = 16$ , $n_{(FRI)} = 14$ , $n_{(KOS)} = 7$ , $n_{(KI)} = 5$ , $n_{(AP)} = 7$ )) | TP      | 0,0%         | 13,3%       | 26,7%        | 60,0%        | (15)         |
|                                                                                                                                                                            | FRI     | 0,0%         | 0,0%        | 35,7%        | 64,3%        | (14)         |
|                                                                                                                                                                            | KOS     | 0,0%         | 0,0%        | 14,3%        | 85,7%        | (7)          |
|                                                                                                                                                                            | KI      | 0,0%         | 0,0%        | 0,0%         | 100,0%       | (3)          |
|                                                                                                                                                                            | AP      | 0,0%         | 0,0%        | 16,7%        | 83,3%        | (6)          |
|                                                                                                                                                                            |         | <b>TOTAL</b> | <b>0,0%</b> | <b>4,4%</b>  | <b>24,4%</b> | <b>71,1%</b> |

Legende: Abkürzungen siehe Tab. 1  
(Ergebnisse für Regressionsanalyse (Mittelwerte) siehe nächste Seite)



## Ergebnisse für Regressionsanalyse (Mittelwerte)

|                                                                                                                                                                               | Branche      | MW (SD)            | Spanne     | B (SE)      | p                |
|-------------------------------------------------------------------------------------------------------------------------------------------------------------------------------|--------------|--------------------|------------|-------------|------------------|
| 1. Mittel gesprüht statt gewischt                                                                                                                                             | TP           | 1,41 (0,61)        | 1-4        | –           | –                |
|                                                                                                                                                                               | FRI          | 1,48 (0,81)        | 1-4        | –           | –                |
|                                                                                                                                                                               | KOS          | 1,38 (0,71)        | 1-4        | –           | –                |
|                                                                                                                                                                               | KI           | 1,63 (0,85)        | 1-4        | 0,23 (0,09) | <b>0,009</b>     |
|                                                                                                                                                                               | AP           | 1,36 (0,58)        | 1-3        |             |                  |
|                                                                                                                                                                               | <b>TOTAL</b> | <b>1,45 (0,71)</b> | <b>1-4</b> |             |                  |
| 2. Flächendesinfektions- und Reinigungsmittel gemischt                                                                                                                        | TP           | 1,11 (0,39)        | 1-4        | –           | –                |
|                                                                                                                                                                               | FRI          | 1,11 (0,42)        | 1-4        | –           | –                |
|                                                                                                                                                                               | KOS          | 1,16 (0,58)        | 1-4        | –           | –                |
|                                                                                                                                                                               | KI           | 1,19 (0,61)        | 1-4        | 0,11 (0,05) | <b>0,045</b>     |
|                                                                                                                                                                               | AP           | 1,03 (0,21)        | 1-3        |             |                  |
|                                                                                                                                                                               | <b>TOTAL</b> | <b>1,11 (0,43)</b> | <b>1-4</b> |             |                  |
| 3. Keine Handschuhe getragen                                                                                                                                                  | TP           | 2,09 (0,98)        | 1-4        | 0,75 (0,10) | <b>&lt;0,001</b> |
|                                                                                                                                                                               | FRI          | 1,67 (0,72)        | 1-4        | 0,33 (0,11) | <b>0,003</b>     |
|                                                                                                                                                                               | KOS          | 1,27 (0,52)        | 1-3        | –           | –                |
|                                                                                                                                                                               | KI           | 2,00 (0,96)        | 1-4        | 0,66 (0,11) | <b>&lt;0,001</b> |
|                                                                                                                                                                               | AP           | 1,36 (0,58)        | 1-4        |             |                  |
|                                                                                                                                                                               | <b>TOTAL</b> | <b>1,73 (0,86)</b> | <b>1-4</b> |             |                  |
| 4. Einwirkzeit nicht beachtet                                                                                                                                                 | TP           | 1,69 (0,60)        | 1-3        | 0,22 (0,08) | <b>0,006</b>     |
|                                                                                                                                                                               | FRI          | 1,75 (0,76)        | 1-4        | 0,28 (0,09) | <b>0,002</b>     |
|                                                                                                                                                                               | KOS          | 1,43 (0,57)        | 1-3        | –           | –                |
|                                                                                                                                                                               | KI           | 1,63 (0,70)        | 1-4        | 0,15 (0,09) | 0,084            |
|                                                                                                                                                                               | AP           | 1,48 (0,52)        | 1-2        |             |                  |
|                                                                                                                                                                               | <b>TOTAL</b> | <b>1,62 (0,64)</b> | <b>1-4</b> |             |                  |
| 5. Konzentrat falsch verdünnt, falls verwendet<br>(Datenbasis: $n_{(total)} = 49$ ( $n_{(TP)} = 16$ , $n_{(FRI)} = 14$ , $n_{(KOS)} = 7$ , $n_{(KI)} = 5$ , $n_{(AP)} = 7$ )) | TP           | 1,53 (0,74)        | 1-3        | 0,30 (0,17) | 0,093            |
|                                                                                                                                                                               | FRI          | 1,36 (0,50)        | 1-2        | –           | –                |
|                                                                                                                                                                               | KOS          | 1,14 (0,38)        | 1-2        | –           | –                |
|                                                                                                                                                                               | KI           | 1,00 (0,00)        | 1-1        | –           | –                |
|                                                                                                                                                                               | AP           | 1,17 (0,41)        | 1-2        |             |                  |
|                                                                                                                                                                               | <b>TOTAL</b> | <b>1,33 (0,56)</b> | <b>1-3</b> |             |                  |

Legende: Abkürzungen: B = Regressionskoeffizient; MW = Mittelwert; n = Anzahl; p = Signifikanzwert; SD = Standardabweichung; SE = Standardfehler von B

Antworten, wenn Aspekt zutrifft; standardisierte Aussagen aus der subjektiven Erfahrung der Befragten. Ergebnis bivariater linearer Regressionsanalysen

Mögliche Werte 1 = nie, 2 = eher selten, 3 = eher häufig, 4 = sehr häufig.

Konstante des Regressionsmodells (Aspekte 1-5):

1. B = 1,41 (SD 0,94);  $R^2 = 0,016$
2. B = 1,09 (SD 0,02);  $R^2 = 0,009$
3. B = 1,34 (SD 0,07);  $R^2 = 0,137$
4. B = 1,47 (SD 0,05);  $R^2 = 0,030$
5. B = 1,23 (SD 0,10);  $R^2 = 0,064$ ;  $p = <0,001$  (alle Modelle)

Datenbasis (Aspekte 1-4):  $N_{(total)} 472$  ( $n_{(TP)} = 127$ ,  $n_{(FRI)} = 94$ ,  $n_{(KOS)} = 32$ ,  $n_{(KI)} = 90$ ,  $n_{(AP)} = 129$ )  
 Gültige Werte  $N_{(total)} 443$  ( $n_{(TP)} = 120$ ,  $n_{(FRI)} = 86$ ,  $n_{(KOS)} = 32$ ,  $n_{(KI)} = 85$ ,  $n_{(AP)} = 120$ )

**Tab. S8: Desinfektionsmittelspezifische Arbeitsschutzqualität**

|                                                                                                                                                                                            | Branche      | %            | n(gültig)    | OR   | CI (95%)  | p                |
|--------------------------------------------------------------------------------------------------------------------------------------------------------------------------------------------|--------------|--------------|--------------|------|-----------|------------------|
| <i>Hygieneplan</i> regelmäßig aktualisiert (vs. nicht vorhanden/nicht regelmäßig aktualisiert)                                                                                             | TP           | 79,0%        | (124)        | 0,32 | 0,15-0,70 | <b>0,004</b>     |
|                                                                                                                                                                                            | FRI          | 85,6%        | (90)         | 0,51 | 0,21-1,21 | –                |
|                                                                                                                                                                                            | KOS          | 87,1%        | (31)         | 0,58 | 0,17-1,98 | –                |
|                                                                                                                                                                                            | KI           | 78,7%        | (89)         | 0,31 | 0,14-0,72 | <b>0,006</b>     |
|                                                                                                                                                                                            | AP           | 92,1%        | (127)        |      |           |                  |
|                                                                                                                                                                                            | <b>TOTAL</b> | <b>84,4%</b> | <b>(461)</b> |      |           |                  |
| <i>Desinfektionsplan</i> regelmäßig aktualisiert vs. nicht vorhanden/nicht regelmäßig aktualisiert                                                                                         | TP           | 75,4%        | (122)        | 0,33 | 0,16-0,68 | <b>0,003</b>     |
|                                                                                                                                                                                            | FRI          | 85,2%        | (88)         | 0,62 | 0,27-1,43 | –                |
|                                                                                                                                                                                            | KOS          | 86,7%        | (30)         | 0,70 | 0,21-2,33 | –                |
|                                                                                                                                                                                            | KI           | 73,2%        | (82)         | 0,29 | 0,14-0,63 | <b>0,002</b>     |
|                                                                                                                                                                                            | AP           | 90,3%        | (124)        |      |           |                  |
|                                                                                                                                                                                            | <b>TOTAL</b> | <b>81,8%</b> | <b>(446)</b> |      |           |                  |
| <i>Sicherheitsdatenblätter</i> für die aktuell verwendeten Desinfektionsmittel                                                                                                             | TP           | 55,6%        | (126)        | 0,22 | 0,12-0,40 | <b>&lt;0,001</b> |
|                                                                                                                                                                                            | FRI          | 58,4%        | (89)         | 0,24 | 0,13-0,47 | <b>&lt;0,001</b> |
|                                                                                                                                                                                            | KOS          | 65,5%        | (29)         | 0,33 | 0,13-0,82 | <b>0,017</b>     |
|                                                                                                                                                                                            | KI           | 34,9%        | (83)         | 0,09 | 0,05-0,18 | <b>&lt;0,001</b> |
|                                                                                                                                                                                            | AP           | 85,2%        | (128)        |      |           |                  |
|                                                                                                                                                                                            | <b>TOTAL</b> | <b>61,3%</b> | <b>(455)</b> |      |           |                  |
| Sicherheitsdatenblätter aufgehängt, <i>sofern vorhanden</i><br>(Datenbasis: $n_{(TP)} = 126$ , $n_{(FRI)} = 89$ , $n_{(KOS)} = 29$ ,<br>$n_{(KI)} = 83$ , $n_{(AP)} = 128$ ) <sup>1)</sup> | TP           | 31,6%        | (57)         |      |           |                  |
|                                                                                                                                                                                            | FRI          | 59,4%        | (32)         |      |           |                  |
|                                                                                                                                                                                            | KOS          | 47,1%        | (17)         |      |           |                  |
|                                                                                                                                                                                            | KI           | 41,7%        | (24)         |      |           |                  |
|                                                                                                                                                                                            | AP           | 52,0%        | (100)        |      |           |                  |
|                                                                                                                                                                                            | <b>TOTAL</b> | <b>46,5%</b> | <b>(230)</b> |      |           |                  |
| Gefahrstoffverzeichnis                                                                                                                                                                     | TP           | 47,6%        | (124)        | 0,79 | 0,32-1,97 | <b>0,001</b>     |
|                                                                                                                                                                                            | FRI          | 67,7%        | (93)         | 1,04 | 0,40-2,73 | –                |
|                                                                                                                                                                                            | KOS          | 37,5%        | (32)         | 0,90 | 0,09-8,71 | <b>0,002</b>     |
|                                                                                                                                                                                            | KI           | 25,8%        | (89)         | 0,23 | 0,07-0,71 | <b>&lt;0,001</b> |
|                                                                                                                                                                                            | AP           | 68,3%        | (120)        |      |           |                  |
|                                                                                                                                                                                            | <b>TOTAL</b> | <b>52,2%</b> | <b>(458)</b> |      |           |                  |
| Gefährdungsbeurteilungen (auch) gefahrstoffbezogen                                                                                                                                         | TP           | 35,4%        | (127)        | 0,33 | 0,20-0,56 | <b>&lt;0,001</b> |
|                                                                                                                                                                                            | FRI          | 50,0%        | (90)         | 0,61 | 0,35-1,05 | 0,074            |
|                                                                                                                                                                                            | KOS          | 16,7%        | (30)         | 0,12 | 0,04-0,34 | <b>&lt;0,001</b> |
|                                                                                                                                                                                            | KI           | 19,1%        | (89)         | 0,14 | 0,08-0,27 | <b>&lt;0,001</b> |
|                                                                                                                                                                                            | AP           | 62,2%        | (127)        |      |           |                  |
|                                                                                                                                                                                            | <b>TOTAL</b> | <b>41,3%</b> | <b>(463)</b> |      |           |                  |

Legende: Abkürzungen siehe Tab. 1

<sup>1)</sup> Dichotomisiert vs. ausschließlich abgelegt

Datenbasis:  $N_{(total)} 472$  ( $n_{(TP)} = 127$ ,  $n_{(FRI)} = 94$ ,  $n_{(KOS)} = 32$ ,  $n_{(KI)} = 90$ ,  $n_{(AP)} = 129$ )

**Tab. S9: Modalitäten gefahrstoffbezogener Gefährdungsbeurteilungen**

|                                                                                                 | Branche      | %            | n(gültig)    | OR   | CI (95%)   | p                |
|-------------------------------------------------------------------------------------------------|--------------|--------------|--------------|------|------------|------------------|
| Gefährdungsbeurteilungen regelmäßig <sup>1)</sup>                                               | TP           | 61,9%        | (42)         |      |            |                  |
|                                                                                                 | FRI          | 61,0%        | (41)         |      |            |                  |
|                                                                                                 | KOS          | 60,0%        | (5)          |      |            |                  |
|                                                                                                 | KI           | 41,2%        | (17)         |      |            |                  |
|                                                                                                 | AP           | 64,9%        | (77)         |      |            |                  |
|                                                                                                 | <b>TOTAL</b> | <b>61,0%</b> | <b>(182)</b> |      |            |                  |
| Unterlagen zur Gefahrstoffbeurteilung aus professioneller Quelle (z.B. BGW) vs. selbst erstellt | TP           | 79,5%        | (44)         |      |            |                  |
|                                                                                                 | FRI          | 95,5%        | (44)         |      |            |                  |
|                                                                                                 | KOS          | 60,0%        | (5)          |      |            |                  |
|                                                                                                 | KI           | 76,5%        | (17)         |      |            |                  |
|                                                                                                 | AP           | 90,9%        | (77)         |      |            |                  |
|                                                                                                 | <b>TOTAL</b> | <b>87,2%</b> | <b>(187)</b> |      |            |                  |
| Gefährdungsbeurteilungen dokumentiert                                                           | TP           | 83,7%        | (43)         | 0,14 | 0,03-0,70  | <b>0,017</b>     |
|                                                                                                 | FRI          | 81,8%        | (44)         | 0,12 | 0,02-0,60  | <b>0,010</b>     |
|                                                                                                 | KOS          | 60,0%        | (5)          | 0,04 | 0,00-0,39  | <b>0,006</b>     |
|                                                                                                 | KI           | 76,5%        | (17)         | 0,09 | 0,01-0,53  | <b>0,008</b>     |
|                                                                                                 | AP           | 97,4%        | (76)         |      |            |                  |
|                                                                                                 | <b>TOTAL</b> | <b>87,6%</b> | <b>(185)</b> |      |            |                  |
| Desinfektionsmittelgefahren in Gefährdungsbeurteilungen thematisiert                            | TP           | 90,9%        | (44)         |      |            |                  |
|                                                                                                 | FRI          | 84,1%        | (44)         |      |            |                  |
|                                                                                                 | KOS          | 100,0%       | (5)          |      |            |                  |
|                                                                                                 | KI           | 76,5%        | (17)         |      |            |                  |
|                                                                                                 | AP           | 92,2%        | (77)         |      |            |                  |
|                                                                                                 | <b>TOTAL</b> | <b>88,8%</b> | <b>(187)</b> |      |            |                  |
| Inhalte in Gefährdungsbeurteilungen an SARS-CoV-2-Pandemie angepasst                            | TP           | 80,0%        | (45)         |      |            |                  |
|                                                                                                 | FRI          | 86,7%        | (45)         |      |            |                  |
|                                                                                                 | KOS          | 100,0%       | (5)          |      |            |                  |
|                                                                                                 | KI           | 64,7%        | (17)         |      |            |                  |
|                                                                                                 | AP           | 88,3%        | (77)         |      |            |                  |
|                                                                                                 | <b>TOTAL</b> | <b>84,1%</b> | <b>(189)</b> |      |            |                  |
| Verbesserungsmaßnahmen nach Gefährdungsbeurteilungen festgelegt <sup>2)</sup>                   | TP           | 54,5%        | (44)         | 3,87 | 1,75-8,56  | <b>0,001</b>     |
|                                                                                                 | FRI          | 59,5%        | (42)         | 4,74 | 2,10-10,67 | <b>&lt;0,001</b> |
|                                                                                                 | KOS          | 20,0%        | (5)          | 0,81 | 0,08-7,68  | –                |
|                                                                                                 | KI           | 17,6%        | (17)         | 0,69 | 0,18-2,68  | –                |
|                                                                                                 | AP           | 23,7%        | (76)         |      |            |                  |
|                                                                                                 | <b>TOTAL</b> | <b>38,6%</b> | <b>(184)</b> |      |            |                  |

Legende: Abkürzungen siehe Tab. 1

<sup>1)</sup> Für alle oder nicht alle Bereiche vs. unregelmäßig alle oder nicht alle Bereiche oder nur bei besonderen Anlässen

<sup>2)</sup> Z.B. Kauf eines weniger reizenden oder besser hautschützenden Mittels

Datenbasis: n<sub>(TP)</sub> = 127, n<sub>(FRI)</sub> = 90, n<sub>(KOS)</sub> = 30, n<sub>(KI)</sub> = 89, n<sub>(AP)</sub> = 127)

**Tab. S10: Verantwortliche Person für den sicheren Umgang mit Desinfektionsmitteln**

|                                                            | Branche      | %            | n <sub>(gültig)</sub> | OR   | CI (95%)  | p            |
|------------------------------------------------------------|--------------|--------------|-----------------------|------|-----------|--------------|
| Mindestens eine verantwortliche Person vs. niemand konkret | TP           | 80,3%        | (127)                 | 0,47 | 0,23-0,96 | <b>0,038</b> |
|                                                            | FRI          | 72,5%        | (91)                  | 0,30 | 0,14-0,63 | <b>0,001</b> |
|                                                            | KOS          | 73,3%        | (30)                  | 0,31 | 0,12-0,85 | <b>0,022</b> |
|                                                            | KI           | 78,4%        | (88)                  | 0,41 | 0,19-0,89 | <b>0,024</b> |
|                                                            | AP           | 89,8%        | (127)                 |      |           |              |
|                                                            | <b>TOTAL</b> | <b>80,6%</b> | <b>(463)</b>          |      |           |              |

Legende: Abkürzungen siehe Tab. 1

Datenbasis:  $N_{(total)} 472$  ( $n_{(TP)} = 127$ ,  $n_{(FRI)} = 94$ ,  $n_{(KOS)} = 32$ ,  $n_{(KI)} = 90$ ,  $n_{(AP)} = 129$ )

**Tab. S11: Information der Beschäftigten zu Händehygiene und sicherem Umgang mit Desinfektionsmitteln**

|                                                                       | Branche      | %                                                                                                                                          | n <sub>(gültig)</sub> | OR   | CI (95%)   | p                |
|-----------------------------------------------------------------------|--------------|--------------------------------------------------------------------------------------------------------------------------------------------|-----------------------|------|------------|------------------|
| Persönliche Information von Beschäftigten                             | TP           | 98,4%                                                                                                                                      | (127)                 |      |            |                  |
|                                                                       | FRI          | 98,9%                                                                                                                                      | (94)                  |      |            |                  |
|                                                                       | KOS          | 93,8%                                                                                                                                      | (32)                  |      |            |                  |
|                                                                       | KI           | 92,2%                                                                                                                                      | (90)                  |      |            |                  |
|                                                                       | AP           | 100,0%                                                                                                                                     | (129)                 |      |            |                  |
|                                                                       | <b>TOTAL</b> | <b>97,5%</b>                                                                                                                               | <b>(472)</b>          |      |            |                  |
| <i>Modalitäten der Informationsvermittlung;<br/>Mehrfachantworten</i> |              | <i>(Datenbasis: n<sub>(TP)</sub> = 127, n<sub>(FRI)</sub> = 94, n<sub>(KOS)</sub> = 32, n<sub>(KI)</sub> = 90, n<sub>(AP)</sub> = 129)</i> |                       |      |            |                  |
| Im Gespräch                                                           | TP           | 37,4%                                                                                                                                      | (123)                 | 1,10 | 0,66-1,84  | –                |
|                                                                       | FRI          | 47,7%                                                                                                                                      | (88)                  | 1,68 | 0,97-2,93  | 0,065            |
|                                                                       | KOS          | 70,4%                                                                                                                                      | (27)                  | 4,38 | 1,78-10,80 | <b>0,001</b>     |
|                                                                       | KI           | 57,7%                                                                                                                                      | (78)                  | 2,52 | 1,41-4,48  | <b>0,002</b>     |
|                                                                       | AP           | 35,2%                                                                                                                                      | (128)                 |      |            |                  |
|                                                                       | <b>TOTAL</b> | <b>44,4%</b>                                                                                                                               | <b>(444)</b>          |      |            |                  |
| In Teamsitzungen                                                      | TP           | 78,0%                                                                                                                                      | (123)                 | 1,56 | 0,88-2,75  | –                |
|                                                                       | FRI          | 63,6%                                                                                                                                      | (88)                  | 0,77 | 0,43-1,36  | –                |
|                                                                       | KOS          | 55,6%                                                                                                                                      | (27)                  | 0,55 | 0,23-1,28  | –                |
|                                                                       | KI           | 53,8%                                                                                                                                      | (78)                  | 0,51 | 0,29-0,92  | <b>0,024</b>     |
|                                                                       | AP           | 69,5%                                                                                                                                      | (128)                 |      |            |                  |
|                                                                       | <b>TOTAL</b> | <b>67,1%</b>                                                                                                                               | <b>(444)</b>          |      |            |                  |
| Bei Unterweisungen                                                    | TP           | 34,1%                                                                                                                                      | (123)                 | 0,17 | 0,10-0,30  | <b>&lt;0,001</b> |
|                                                                       | FRI          | 22,7%                                                                                                                                      | (88)                  | 0,10 | 0,05-0,19  | <b>&lt;0,001</b> |
|                                                                       | KOS          | 48,1%                                                                                                                                      | (27)                  | 0,31 | 0,13-0,73  | <b>0,007</b>     |
|                                                                       | KI           | 28,2%                                                                                                                                      | (78)                  | 0,13 | 0,07-0,25  | <b>&lt;0,001</b> |
|                                                                       | AP           | 75,0%                                                                                                                                      | (128)                 |      |            |                  |
|                                                                       | <b>TOTAL</b> | <b>43,5%</b>                                                                                                                               | <b>(444)</b>          |      |            |                  |

Legende: Abkürzungen siehe Tab. 1

Datenbasis: N<sub>(total)</sub> 472 (n<sub>(TP)</sub> = 127, n<sub>(FRI)</sub> = 94, n<sub>(KOS)</sub> = 32, n<sub>(KI)</sub> = 90, n<sub>(AP)</sub> = 129)

**Tab. S12: Modalitäten der Unterweisung**

|                                                                             | Branche      | %            | n(gültig)  | OR   | CI (95%)  | p            |
|-----------------------------------------------------------------------------|--------------|--------------|------------|------|-----------|--------------|
| Einmal <i>jährlich</i> oder öfters                                          | TP           | 97,4%        | 39         |      |           |              |
|                                                                             | FRI          | 100,0%       | 17         |      |           |              |
|                                                                             | KOS          | 100,0%       | 12         |      |           |              |
|                                                                             | KI           | 90,0%        | 20         |      |           |              |
|                                                                             | AP           | 95,5%        | 89         |      |           |              |
|                                                                             | <b>TOTAL</b> | <b>97,4%</b> | <b>177</b> |      |           |              |
| Anhand einer Betriebsanweisung                                              | TP           | 87,9%        | 33         |      |           |              |
|                                                                             | FRI          | 100,0%       | 14         |      |           |              |
|                                                                             | KOS          | 90,0%        | 10         |      |           |              |
|                                                                             | KI           | 86,7%        | 15         |      |           |              |
|                                                                             | AP           | 88,0%        | 75         |      |           |              |
|                                                                             | <b>TOTAL</b> | <b>89,1%</b> | <b>147</b> |      |           |              |
| Dokumentation mit Unterschrift                                              | TP           | 82,5%        | 40         | 0,28 | 0,08-0,96 | <b>0,043</b> |
|                                                                             | FRI          | 77,8%        | 18         | 0,21 | 0,05-0,88 | <b>0,033</b> |
|                                                                             | KOS          | 58,3%        | 12         | 0,08 | 0,02-0,36 | <b>0,001</b> |
|                                                                             | KI           | 77,8%        | 18         | 0,21 | 0,05-0,88 | <b>0,033</b> |
|                                                                             | AP           | 94,3%        | 88         |      |           |              |
|                                                                             | <b>TOTAL</b> | <b>85,8%</b> | <b>176</b> |      |           |              |
| Unterweisung auch neuer <i>Beschäftigter</i> , wenn dies zutrifft           | TP           | 100,0%       | 37         |      |           |              |
|                                                                             | FRI          | 92,9%        | 14         |      |           |              |
|                                                                             | KOS          | 100,0%       | 10         |      |           |              |
|                                                                             | KI           | 100,0%       | 17         |      |           |              |
|                                                                             | AP           | 98,9%        | 93         |      |           |              |
|                                                                             | <b>TOTAL</b> | <b>98,8%</b> | <b>171</b> |      |           |              |
| Unterweisung auch angestellter <i>Reinigungskräfte</i> , wenn dies zutrifft | TP           | 89,7%        | 29         |      |           |              |
|                                                                             | FRI          | 80,0%        | 5          |      |           |              |
|                                                                             | KOS          | 100,0%       | 2          |      |           |              |
|                                                                             | KI           | 91,7%        | 12         |      |           |              |
|                                                                             | AP           | 94,5%        | 73         |      |           |              |
|                                                                             | <b>TOTAL</b> | <b>92,6%</b> | <b>121</b> |      |           |              |

Legende: Abkürzungen siehe Tab. 1

Datenbasis:  $N_{(total)} 444$  ( $n_{(TP)} = 123$ ,  $n_{(FRI)} = 88$ ,  $n_{(KOS)} = 27$ ,  $n_{(KI)} = 78$ ,  $n_{(AP)} = 128$ , wenn Unterweisung erfolgt

**Tab. S13: Anzahl der Quellen zur Informationsgewinnung von Arbeitsschutzthemen**

Ankreuzen von insgesamt neun standardisiert vorgegebenen Quellen (1 = ja, 0 =nein): 1. BGW (telefonische/ persönliche Beratung), 2. BGW (Homepage, Newsletter, Mitgliederzeitschrift), 3. Arbeitgeber-/ Berufsverband/ Innung/ Berufskammer (Homepage, Newsletter, Mitgliedszeitschrift), 4. Robert Koch- Institut – RKI, (Homepage, Zeitung, TV), 5. Suchmaschine im Internet, 6. Fortbildungen, 7. Fachkraft für Arbeitssicherheit, 8. Betriebsarzt/-ärztin, 9. Kolleginnen/ Kollegen

| Branche      | MW         | SD         | Median   | Spanne     | n(gültig)  | B     | SE   | p      |
|--------------|------------|------------|----------|------------|------------|-------|------|--------|
| TP           | 2,9        | 1,4        | 3        | 1-7        | 123        | -0,92 | 0,19 | <0,001 |
| FRI          | 2,7        | 1,4        | 2        | 1-7        | 93         | -1,20 | 0,20 | <0,001 |
| KOS          | 3,0        | 1,3        | 3        | 1-6        | 28         | -0,86 | 0,31 | 0,005  |
| KI           | 3,2        | 1,4        | 3        | 1-6        | 84         | -0,66 | 0,21 | 0,002  |
| AP           | 3,9        | 1,7        | 4        | 1-9        | 123        |       |      |        |
| <b>TOTAL</b> | <b>3,2</b> | <b>1,5</b> | <b>3</b> | <b>1-9</b> | <b>451</b> |       |      |        |

Legende: Abkürzungen: B = Regressionskoeffizient; MW = Mittelwert; n = Anzahl; p = Signifikanzwert; SD = Standardabweichung; SE = Standardfehler von B

Ergebnis bivariater linearer Regressionsanalysen

Konstante des Regressionsmodells = 3,86 (SD 0,13);  $p < 0,001$ ;  $R^2 = 0,09$

Datenbasis:  $n_{(TP)} = 127$ ,  $n_{(FRI)} = 94$ ,  $n_{(KOS)} = 32$ ,  $n_{(KI)} = 90$ ,  $n_{(AP)} = 129$

**Tab. S14: Art der Quellen zur Informationsgewinnung von Arbeitsschutzthemen**

|                                                                                                  | Branche      | %            | n(gültig)  | OR   | CI (95%)  | p                |
|--------------------------------------------------------------------------------------------------|--------------|--------------|------------|------|-----------|------------------|
| BGW (telefonische/persönliche Beratung)                                                          | TP           | 9,4%         | 123        | 0,78 | 0,35-1,74 | –                |
|                                                                                                  | FRI          | 21,3%        | 93         | 1,97 | 0,95-4,10 | 0,069            |
|                                                                                                  | KOS          | 12,5%        | 28         | 1,20 | 0,37-3,94 | –                |
|                                                                                                  | KI           | 22,2%        | 84         | 2,25 | 1,08-4,70 | <b>0,031</b>     |
|                                                                                                  | AP           | 11,6%        | 123        |      |           |                  |
|                                                                                                  | <b>TOTAL</b> | <b>15,0%</b> | <b>451</b> |      |           |                  |
| BGW (Homepage, Newsletter, Mitgliederzeit-schrift)                                               | TP           | 72,4%        | 123        | 1,48 | 0,85-2,58 | –                |
|                                                                                                  | FRI          | 79,8%        | 93         | 2,08 | 1,10-3,94 | <b>0,024</b>     |
|                                                                                                  | KOS          | 59,4%        | 28         | 1,06 | 0,44-2,54 | –                |
|                                                                                                  | KI           | 62,2%        | 84         | 1,00 | 0,56-1,80 | –                |
|                                                                                                  | AP           | 63,6%        | 123        |      |           |                  |
|                                                                                                  | <b>TOTAL</b> | <b>68,6%</b> | <b>451</b> |      |           |                  |
| Arbeitgeber-/ Berufsverband/ Innung/ Berufs-kammer (Homepage, Newsletter, Mitglieds-zeitschrift) | TP           | 55,1%        | 123        | 1,63 | 0,99-2,70 | 0,056            |
|                                                                                                  | FRI          | 48,9%        | 93         | 1,21 | 0,71-2,08 | –                |
|                                                                                                  | KOS          | 37,5%        | 28         | 0,93 | 0,40-2,12 | –                |
|                                                                                                  | KI           | 10,0%        | 84         | 0,15 | 0,07-0,32 | <b>&lt;0,001</b> |
|                                                                                                  | AP           | 42,6%        | 123        |      |           |                  |
|                                                                                                  | <b>TOTAL</b> | <b>40,7%</b> | <b>451</b> |      |           |                  |
| Robert Koch- Institut – RKI (Homepage, Zei-tung, TV)                                             | TP           | 27,6%        | 123        | 0,16 | 0,09-0,28 | <b>&lt;0,001</b> |
|                                                                                                  | FRI          | 20,2%        | 93         | 0,10 | 0,05-0,19 | <b>&lt;0,001</b> |
|                                                                                                  | KOS          | 40,6%        | 28         | 0,34 | 0,15-0,80 | <b>0,013</b>     |
|                                                                                                  | KI           | 40,0%        | 84         | 0,30 | 0,17-0,53 | <b>&lt;0,001</b> |
|                                                                                                  | AP           | 68,2%        | 123        |      |           |                  |
|                                                                                                  | <b>TOTAL</b> | <b>40,5%</b> | <b>451</b> |      |           |                  |
| Suchmaschine im Internet                                                                         | TP           | 35,4%        | 123        |      |           |                  |
|                                                                                                  | FRI          | 24,5%        | 93         |      |           |                  |
|                                                                                                  | KOS          | 43,8%        | 28         |      |           |                  |
|                                                                                                  | KI           | 37,8%        | 84         |      |           |                  |
|                                                                                                  | AP           | 31,0%        | 123        |      |           |                  |
|                                                                                                  | <b>TOTAL</b> | <b>33,1%</b> | <b>451</b> |      |           |                  |
| Fortbildungen                                                                                    | TP           | 14,2%        | 123        | 0,17 | 0,09-0,31 | <b>&lt;0,001</b> |
|                                                                                                  | FRI          | 20,2%        | 93         | 0,25 | 0,14-0,47 | <b>&lt;0,001</b> |
|                                                                                                  | KOS          | 21,9%        | 28         | 0,33 | 0,13-0,83 | <b>0,018</b>     |
|                                                                                                  | KI           | 52,2%        | 84         | 1,25 | 0,72-2,18 | –                |
|                                                                                                  | AP           | 48,1%        | 123        |      |           |                  |
|                                                                                                  | <b>TOTAL</b> | <b>32,4%</b> | <b>451</b> |      |           |                  |
| Fachkraft für Arbeitssicherheit                                                                  | TP           | 33,9%        | 123        | 0,62 | 0,37-1,04 | 0,070            |
|                                                                                                  | FRI          | 17,0%        | 93         | 0,24 | 0,13-0,46 | <b>&lt;0,001</b> |
|                                                                                                  | KOS          | 18,8%        | 28         | 0,32 | 0,12-0,83 | <b>0,020</b>     |
|                                                                                                  | KI           | 17,8%        | 84         | 0,27 | 0,14-0,52 | <b>&lt;0,001</b> |
|                                                                                                  | AP           | 44,2%        | 123        |      |           |                  |
|                                                                                                  | <b>TOTAL</b> | <b>29,2%</b> | <b>451</b> |      |           |                  |

(Fortsetzung nächste Seite)



| <b>(Fortsetzung)</b>        | <b>Branche</b> | <b>%</b>     | <b>n<sub>(gültig)</sub></b> | <b>OR</b> | <b>CI<sub>(95%)</sub></b> | <b>p</b>         |
|-----------------------------|----------------|--------------|-----------------------------|-----------|---------------------------|------------------|
| Betriebsärztin/-arzt        | TP             | 13,4%        | 123                         | 0,20      | 0,11-0,37                 | <b>&lt;0,001</b> |
|                             | FRI            | 6,4%         | 93                          | 0,09      | 0,03-0,21                 | <b>&lt;0,001</b> |
|                             | KOS            | 9,4%         | 28                          | 0,15      | 0,04-0,52                 | <b>0,003</b>     |
|                             | KI             | 11,1%        | 84                          | 0,17      | 0,08-0,35                 | <b>&lt;0,001</b> |
|                             | AP             | 42,6%        | 123                         |           |                           |                  |
|                             | <b>TOTAL</b>   | <b>19,3%</b> | <b>451</b>                  |           |                           |                  |
| Andere Kolleginnen/Kollegen | TP             | 20,5%        | 123                         | 1,47      | 0,76-2,82                 | –                |
|                             | FRI            | 24,5%        | 93                          | 1,80      | 0,91-3,55                 | <b>0,090</b>     |
|                             | KOS            | 18,8%        | 28                          | 1,49      | 0,53-4,17                 | –                |
|                             | KI             | 37,8%        | 84                          | 3,72      | 1,93-7,17                 | <b>&lt;0,001</b> |
|                             | AP             | 14,7%        | 123                         |           |                           |                  |
|                             | <b>TOTAL</b>   | <b>22,9%</b> | <b>451</b>                  |           |                           |                  |

Legende: Abkürzungen siehe Tab. 1

Neun standardisiert vorgegebene Mehrfachantworten; Antwortverteilung bei mindestens einer Nennung

Sonstige Nennungen (Freitext): Gesundheits- bzw. Jugendamt, berufliche Fachzeitschrift, Sicherheitsbeauftragte/r, Kita-Träger, Apotheke: TP: n = 4; FRI: n = 1; KOS: n = 0; KI: n=7; AP: n=2

Datenbasis:  $n_{(TP)} = 127$ ,  $n_{(FRI)} = 94$ ,  $n_{(KOS)} = 32$ ,  $n_{(KI)} = 90$ ,  $n_{(AP)} = 129$
